# Supplementary material
Source: publisher figshare collection journal article supplement (https://acs.figshare.com/ndownloader/files/5186470)
Supplement: Supplementary file 1 [file 5186470]

## Supporting Information

### Hydrolytic Reaction by Zinc Finger Mutant Peptides: Successful Redesign of Structural Zinc Sites into Catalytic Zinc Sites

Akiko Nomura and Yukio Sugiura\*

Institute for Chemical Research, Kyoto University, Uji, Kyoto 611-0011, Japan

E-mail: sugiura@scl.kyoto-u.ac.jp

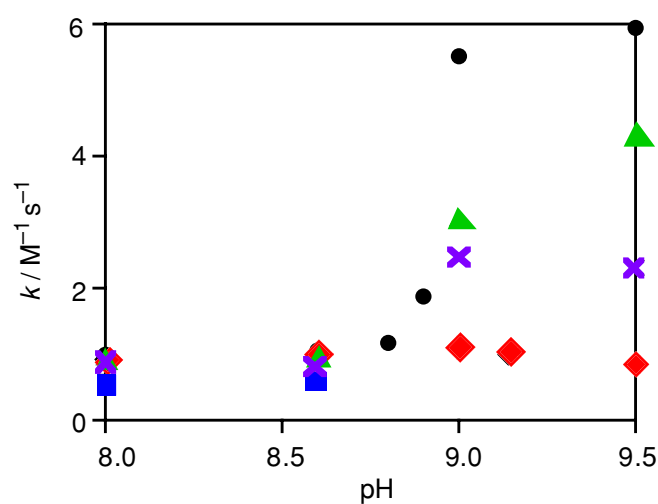

**Figure S1.** pH-rate profile for  $k$  of NA hydrolysis with zinc finger peptides: Zn(II)-zf(CCHG) (purple), Zn(II)-zf(CCHA) (red), Zn(II)-zf(CGHH) (green), Zn(II)-zf(HHHH) (black), and apo-zf(HHHH) (blue) in basic pH region.
